# Supplementary material for: Surface hopping dynamics reveal ultrafast triplet generation promoted by S1–T2–T1 spin-vibronic coupling in 2-mercaptobenzothiazole
Source: Royal Society of Chemistry journal article supplement (doi:10.1039/d1cp02587b), 2021-01-01
Supplement: d1cp02587b1.pdf [file d1cp02587b1.pdf]

**Electronic Supplementary Information for:**

**Surface hopping dynamics reveal ultrafast triplet  
generation promoted by  $S_1$ - $T_2$ - $T_1$  spin-vibronic coupling in  
2-mercaptobenzothiazole**

Chithra M. J., Probal Nag, and Sivaranjana Reddy Vennapusa\*

School of Chemistry, Indian Institute of Science Education and Research  
Thiruvananthapuram, Maruthamala PO, Vithura, Thiruvananthapuram 695551, India.  
Email: siva@iisertvm.ac.in

## Table of contents

**Table SM1:** Harmonic vibrational frequencies of **MBT**

**Table SM2:** Ground-state ( $S_0$ ) equilibrium geometry of **MBT** optimized at MP2/aug-cc-PVTZ level of theory

**Table SM3:**  $S_1^{\min}$  geometry of **MBT** obtained at ADC(2)/def2-TZVP level of theory using external ORCA optimizer

**Table SM4:**  $S_2^{\min}$  geometry of **MBT** obtained at ADC(2)/def2-TZVP level of theory using external ORCA optimizer

**Table SM5:**  $T_1^{\min}$  geometry of **MBT** obtained at ADC(2)/def2-TZVP level of theory using external ORCA optimizer

**Table SM6:**  $T_2^{\min}$  geometry of **MBT** obtained at ADC(2)/def2-TZVP level of theory using external ORCA optimizer

**Table SM7:**  $S_2/S_1$  MECP geometry of **MBT** obtained at ADC(2)/def2-TZVP level of theory using external ORCA optimizer

**Table SM8:**  $S_1/T_2$  MECP geometry of **MBT** obtained at ADC(2)/def2-TZVP level of theory using external ORCA optimizer

**Table SM9:**  $T_2/T_1$  MECP geometry of **MBT** obtained at ADC(2)/def2-TZVP level of theory using external ORCA optimizer

**Figure SM1:** Time-evolution of the low-lying singlets ( $S_1$  and  $S_2$ ) and triplets ( $T_1$  and  $T_2$ ) generated upon photoexcitation to “bright”  $S_2$  of **MBT** and the corresponding population fit as obtained through SHARC

**Table SM1:** Symmetry and harmonic frequency ( $\omega$ ) of the vibrational modes of MBT at MP2/aug-cc-PVTZ level of theory.

| No.(Sym.)              | Freq (in $\text{cm}^{-1}$ ) |
|------------------------|-----------------------------|
| $\nu_1(\text{a}'')$    | 92.0720                     |
| $\nu_2(\text{a}'')$    | 184.6766                    |
| $\nu_3(\text{a}')$     | 209.5027                    |
| $\nu_4(\text{a}'')$    | 277.2714                    |
| $\nu_5(\text{a}')$     | 378.3835                    |
| $\nu_6(\text{a}')$     | 401.1337                    |
| $\nu_7(\text{a}'')$    | 414.3494                    |
| $\nu_8(\text{a}')$     | 497.3884                    |
| $\nu_9(\text{a}'')$    | 508.1080                    |
| $\nu_{10}(\text{a}'')$ | 546.1555                    |
| $\nu_{11}(\text{a}'')$ | 582.1962                    |
| $\nu_{12}(\text{a}')$  | 613.2564                    |
| $\nu_{13}(\text{a}'')$ | 656.6858                    |
| $\nu_{14}(\text{a}')$  | 665.0128                    |
| $\nu_{15}(\text{a}')$  | 714.0417                    |
| $\nu_{16}(\text{a}'')$ | 750.5626                    |
| $\nu_{17}(\text{a}'')$ | 845.1070                    |
| $\nu_{18}(\text{a}')$  | 877.5735                    |
| $\nu_{19}(\text{a}'')$ | 925.1144                    |
| $\nu_{20}(\text{a}'')$ | 946.1409                    |
| $\nu_{21}(\text{a}')$  | 1036.3980                   |
| $\nu_{22}(\text{a}')$  | 1064.9191                   |
| $\nu_{23}(\text{a}')$  | 1107.9035                   |
| $\nu_{24}(\text{a}')$  | 1149.6771                   |
| $\nu_{25}(\text{a}')$  | 1175.6754                   |
| $\nu_{26}(\text{a}')$  | 1247.2210                   |
| $\nu_{27}(\text{a}')$  | 1282.0751                   |
| $\nu_{28}(\text{a}')$  | 1311.8605                   |
| $\nu_{29}(\text{a}')$  | 1437.2533                   |
| $\nu_{30}(\text{a}')$  | 1475.2271                   |
| $\nu_{31}(\text{a}')$  | 1494.0887                   |
| $\nu_{32}(\text{a}')$  | 1513.2085                   |
| $\nu_{33}(\text{a}')$  | 1614.7176                   |
| $\nu_{34}(\text{a}')$  | 1637.7736                   |
| $\nu_{35}(\text{a}')$  | 3205.6328                   |
| $\nu_{36}(\text{a}')$  | 3213.7655                   |
| $\nu_{37}(\text{a}')$  | 3223.7123                   |
| $\nu_{38}(\text{a}')$  | 3233.8427                   |
| $\nu_{39}(\text{a}')$  | 3598.8645                   |

**Table SM2:** Ground-state ( $S_0$ ) equilibrium geometry of MBT optimized at MP2/aug-cc-PVTZ level of theory.

| Atom | Coordinates (Angstroms) |           |          |
|------|-------------------------|-----------|----------|
|      | X                       | Y         | Z        |
| C    | -1.021778               | 0.016214  | 0.000000 |
| C    | 0.000000                | 0.978049  | 0.000000 |
| C    | -0.295498               | 2.340441  | 0.000000 |
| C    | -1.633384               | 2.720539  | 0.000000 |
| C    | -2.655222               | 1.762593  | 0.000000 |
| C    | -2.361090               | 0.402139  | 0.000000 |
| C    | 1.309653                | -0.972813 | 0.000000 |
| H    | 0.495846                | 3.079010  | 0.000000 |
| H    | -1.885967               | 3.772198  | 0.000000 |
| H    | -3.688188               | 2.083286  | 0.000000 |
| H    | -3.149675               | -0.338300 | 0.000000 |
| N    | 1.249704                | 0.391373  | 0.000000 |
| H    | 2.118421                | 0.908785  | 0.000000 |
| S    | 2.670804                | -1.893212 | 0.000000 |
| S    | -0.339207               | -1.589760 | 0.000000 |

**Table SM3:**  $S_1^{\min}$  geometry of MBT obtained at ADC(2)/def2-TZVP level of theory using external ORCA optimizer.

| Atom | Coordinates (Angstroms) |           |           |
|------|-------------------------|-----------|-----------|
|      | X                       | Y         | Z         |
| C    | -0.967041               | -0.011402 | 0.059871  |
| C    | 0.025077                | 0.982640  | 0.184640  |
| C    | -0.312543               | 2.328736  | 0.033518  |
| C    | -1.632233               | 2.653266  | -0.266640 |
| C    | -2.614162               | 1.665176  | -0.397283 |
| C    | -2.286923               | 0.321474  | -0.234835 |
| C    | 1.344037                | -0.929644 | 0.531285  |
| H    | 0.442364                | 3.101010  | 0.134640  |
| H    | -1.901449               | 3.695016  | -0.398546 |
| H    | -3.635115               | 1.944626  | -0.628446 |
| H    | -3.040499               | -0.451836 | -0.332700 |
| N    | 1.267814                | 0.465931  | 0.480656  |
| H    | 2.110331                | 0.993489  | 0.291437  |
| S    | 2.294908                | -1.921945 | -0.588084 |
| S    | -0.297807               | -1.590376 | 0.391955  |

**Table SM4:**  $S_2^{\min}$  geometry of MBT obtained at ADC(2)/def2-TZVP level of theory using external ORCA optimizer.

| Atom | Coordinates (Angstroms) |           |           |
|------|-------------------------|-----------|-----------|
|      | X                       | Y         | Z         |
| C    | -1.016676               | 0.006003  | 0.149097  |
| C    | 0.017833                | 0.973695  | 0.112697  |
| C    | -0.282991               | 2.336267  | -0.022035 |
| C    | -1.614075               | 2.706838  | -0.116633 |
| C    | -2.642322               | 1.747968  | -0.086340 |
| C    | -2.355155               | 0.396562  | 0.038842  |
| C    | 1.287089                | -0.977193 | 0.449953  |
| H    | 0.509937                | 3.075769  | -0.044930 |
| H    | -1.867388               | 3.756338  | -0.211943 |
| H    | -3.674437               | 2.070003  | -0.159955 |
| H    | -3.146076               | -0.344442 | 0.057672  |
| N    | 1.247991                | 0.397741  | 0.196690  |
| H    | 2.125645                | 0.893052  | 0.081952  |
| S    | 2.515610                | -1.835425 | -0.597434 |
| S    | -0.357438               | -1.589532 | 0.240302  |

**Table SM5:**  $T_1^{\min}$  geometry of MBT obtained at ADC(2)/def2-TZVP level of theory using external ORCA optimizer.

| Atom | Coordinates (Angstroms) |           |           |
|------|-------------------------|-----------|-----------|
|      | X                       | Y         | Z         |
| C    | -0.943762               | -0.001937 | -0.068013 |
| C    | 0.061136                | 0.965612  | 0.177008  |
| C    | -0.245971               | 2.331492  | 0.088730  |
| C    | -1.536808               | 2.697596  | -0.259608 |
| C    | -2.528541               | 1.736961  | -0.516668 |
| C    | -2.237158               | 0.382500  | -0.429043 |
| C    | 1.307894                | -1.010188 | 0.560496  |
| H    | 0.515237                | 3.080028  | 0.279757  |
| H    | -1.785106               | 3.750265  | -0.333417 |
| H    | -3.529128               | 2.054904  | -0.783511 |
| H    | -2.997132               | -0.366014 | -0.622878 |
| N    | 1.261771                | 0.404143  | 0.466577  |
| H    | 2.106354                | 0.942869  | 0.605188  |
| S    | 2.469659                | -1.934165 | -0.368764 |
| S    | -0.313487               | -1.599979 | 0.144069  |

**Table SM6:**  $T_2^{\min}$  geometry of MBT obtained at ADC(2)/def2-TZVP level of theory using external ORCA optimizer.

| Atom | Coordinates (Angstroms) |           |           |
|------|-------------------------|-----------|-----------|
|      | X                       | Y         | Z         |
| C    | -0.980150               | 0.003028  | 0.042842  |
| C    | 0.025642                | 0.964935  | -0.143049 |
| C    | -0.291493               | 2.322187  | -0.141396 |
| C    | -1.618928               | 2.697805  | 0.055913  |
| C    | -2.615932               | 1.739800  | 0.249156  |
| C    | -2.303591               | 0.379904  | 0.239444  |
| C    | 1.281483                | -0.997497 | -0.439579 |
| H    | 0.482461                | 3.068784  | -0.285819 |
| H    | -1.875933               | 3.750766  | 0.061544  |
| H    | -3.642138               | 2.051872  | 0.403293  |
| H    | -3.075083               | -0.368900 | 0.379178  |
| N    | 1.280095                | 0.405344  | -0.292701 |
| H    | 2.027057                | 0.936070  | -0.723950 |
| S    | 2.671437                | -1.869537 | 0.242604  |
| S    | -0.333954               | -1.623363 | -0.048728 |

**Table SM7:**  $S_2/S_1$  MECP geometry of MBT obtained at ADC(2)/def2-TZVP level of theory using external ORCA optimizer.

| Atom | Coordinates (Angstroms) |           |           |
|------|-------------------------|-----------|-----------|
|      | X                       | Y         | Z         |
| C    | -1.001741               | 0.004285  | 0.040904  |
| C    | 0.054003                | 0.950215  | 0.105863  |
| C    | -0.205635               | 2.323970  | -0.014606 |
| C    | -1.516875               | 2.726823  | -0.192109 |
| C    | -2.566552               | 1.790511  | -0.261978 |
| C    | -2.320902               | 0.431033  | -0.157582 |
| C    | 1.253158                | -1.038115 | 0.473778  |
| H    | 0.603576                | 3.044022  | 0.038776  |
| H    | -1.741651               | 3.783924  | -0.273888 |
| H    | -3.583072               | 2.140150  | -0.399487 |
| H    | -3.127686               | -0.290376 | -0.218209 |
| N    | 1.259699                | 0.341527  | 0.254019  |
| H    | 2.159759                | 0.807613  | 0.195425  |
| S    | 2.514937                | -1.859102 | -0.585098 |
| S    | -0.377040               | -1.601557 | 0.105407  |

**Table SM8:**  $S_1/T_2$  MECP geometry of MBT obtained at ADC(2)/def2-TZVP level of theory using external ORCA optimizer.

| Atom | Coordinates (Angstroms) |           |           |
|------|-------------------------|-----------|-----------|
|      | X                       | Y         | Z         |
| C    | -0.973760               | 0.001465  | -0.088202 |
| C    | 0.040126                | 0.941276  | 0.182170  |
| C    | -0.220613               | 2.307058  | 0.061755  |
| C    | -1.487422               | 2.708434  | -0.353666 |
| C    | -2.490819               | 1.774144  | -0.628065 |
| C    | -2.240068               | 0.409584  | -0.496584 |
| C    | 1.221263                | -1.047344 | 0.602618  |
| H    | 0.552874                | 3.036763  | 0.276274  |
| H    | -1.696606               | 3.766464  | -0.462376 |
| H    | -3.470121               | 2.110865  | -0.946730 |
| H    | -3.013256               | -0.321073 | -0.705731 |
| N    | 1.220661                | 0.352129  | 0.577305  |
| H    | 2.100256                | 0.849299  | 0.531271  |
| S    | 2.415494                | -2.010092 | -0.291816 |
| S    | -0.412121               | -1.625349 | 0.224023  |

**Table SM9:**  $T_2/T_1$  MECP geometry of MBT obtained at ADC(2)/def2-TZVP level of theory using external ORCA optimizer.

| Atom | Coordinates (Angstroms) |           |           |
|------|-------------------------|-----------|-----------|
|      | X                       | Y         | Z         |
| C    | -0.975589               | 0.014356  | -0.038617 |
| C    | 0.013597                | 1.006264  | -0.030116 |
| C    | -0.342304               | 2.351012  | -0.016524 |
| C    | -1.696901               | 2.686931  | -0.003831 |
| C    | -2.679038               | 1.697774  | -0.002933 |
| C    | -2.323762               | 0.346941  | -0.026931 |
| C    | 1.357341                | -0.907681 | -0.181507 |
| H    | 0.421252                | 3.121892  | -0.006712 |
| H    | -1.983463               | 3.732109  | 0.012408  |
| H    | -3.726733               | 1.974098  | 0.012295  |
| H    | -3.083715               | -0.426229 | -0.039914 |
| N    | 1.307258                | 0.491899  | -0.016583 |
| H    | 2.049324                | 1.038490  | -0.438450 |
| S    | 2.638623                | -1.768817 | 0.706753  |
| S    | -0.276234               | -1.596730 | -0.142667 |

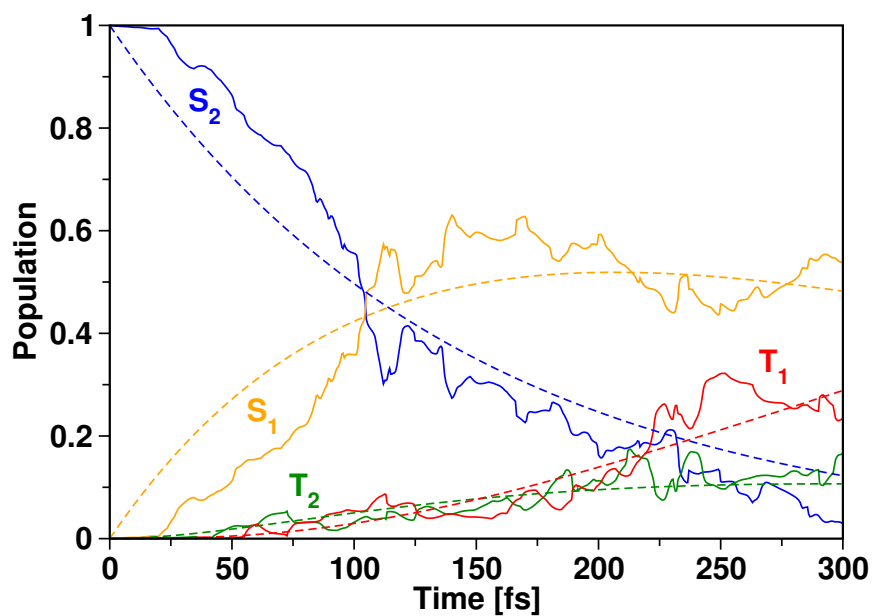

**Figure SM1:** Time-evolution of the low-lying singlets ( $S_1$  and  $S_2$ ) and triplets ( $T_1$  and  $T_2$ ) generated upon photoexcitation to “bright”  $S_2$  of MBT and the corresponding population fit (shown by solid and dashed lines, respectively) as obtained through SHARC.
